# Supplementary material for: LiNbO3 and ZnO–Ni multilayer thin films as hybrid metamaterials towards tunable properties
Source: Royal Society of Chemistry journal article supplement (doi:10.1039/d5ra08365f), 2026-04-24
Supplement: d5ra08365f1.pdf [file d5ra08365f1.pdf]

## Supplementary Information

### LiNbO<sub>3</sub> and ZnO-Ni Multilayer Thin Films as Hybrid Metamaterials Towards Tunable Properties

Authors: Nirali A. Bhatt<sup>1</sup>, Lizabeth Quigley<sup>1</sup>, Juanjuan Lu<sup>1</sup>, Claire Mihalko<sup>1</sup>, Aleem Siddiqui<sup>3</sup>, Raktim Sarma<sup>3,4</sup>, Haiyan Wang<sup>1,2,\*</sup>

<sup>1</sup> School of Materials Engineering, Purdue University, West Lafayette, IN 47907, USA

<sup>2</sup> School of Electrical and Computer Engineering, Purdue University, West Lafayette, IN 47907, USA

<sup>3</sup> Sandia National Laboratories, Albuquerque, NM 87123, USA

<sup>4</sup> Center for Integrated Nanotechnologies, Sandia National Laboratories, Albuquerque, NM 87123, USA

\* Author to whom correspondence should be addressed: [hwang00@purdue.edu](mailto:hwang00@purdue.edu)

## Supporting Information

The supporting information includes the following.

**Figure S1:** Magnetic data of magnetic moment versus magnetic field for (a)2-ZN, (b)4-ZN, (c)2-LNO, and (d)4-LNO measured at 300K. The inset graph seen in all plots is to show the coercivities.

**Table S1:** Extracted saturation polarization ( $P_{Max}$ ) and coercive Field ( $E_C$ ) from ferroelectric polarization versus electric field (P-E) loops for sample 2-ZN.

**Table S2:** Extracted saturation polarization ( $P_{Max}$ ) and coercive Field ( $E_C$ ) from ferroelectric polarization versus electric field (P-E) loops for sample 4-ZN.

**Table S3:** Extracted saturation polarization ( $P_{Max}$ ) and coercive Field ( $E_C$ ) from ferroelectric polarization versus electric field (P-E) loops for sample 2-LNO.

**Table S4:** Extracted saturation polarization ( $P_{Max}$ ) and coercive Field ( $E_C$ ) from ferroelectric polarization versus electric field (P-E) loops for sample 4-LNO.

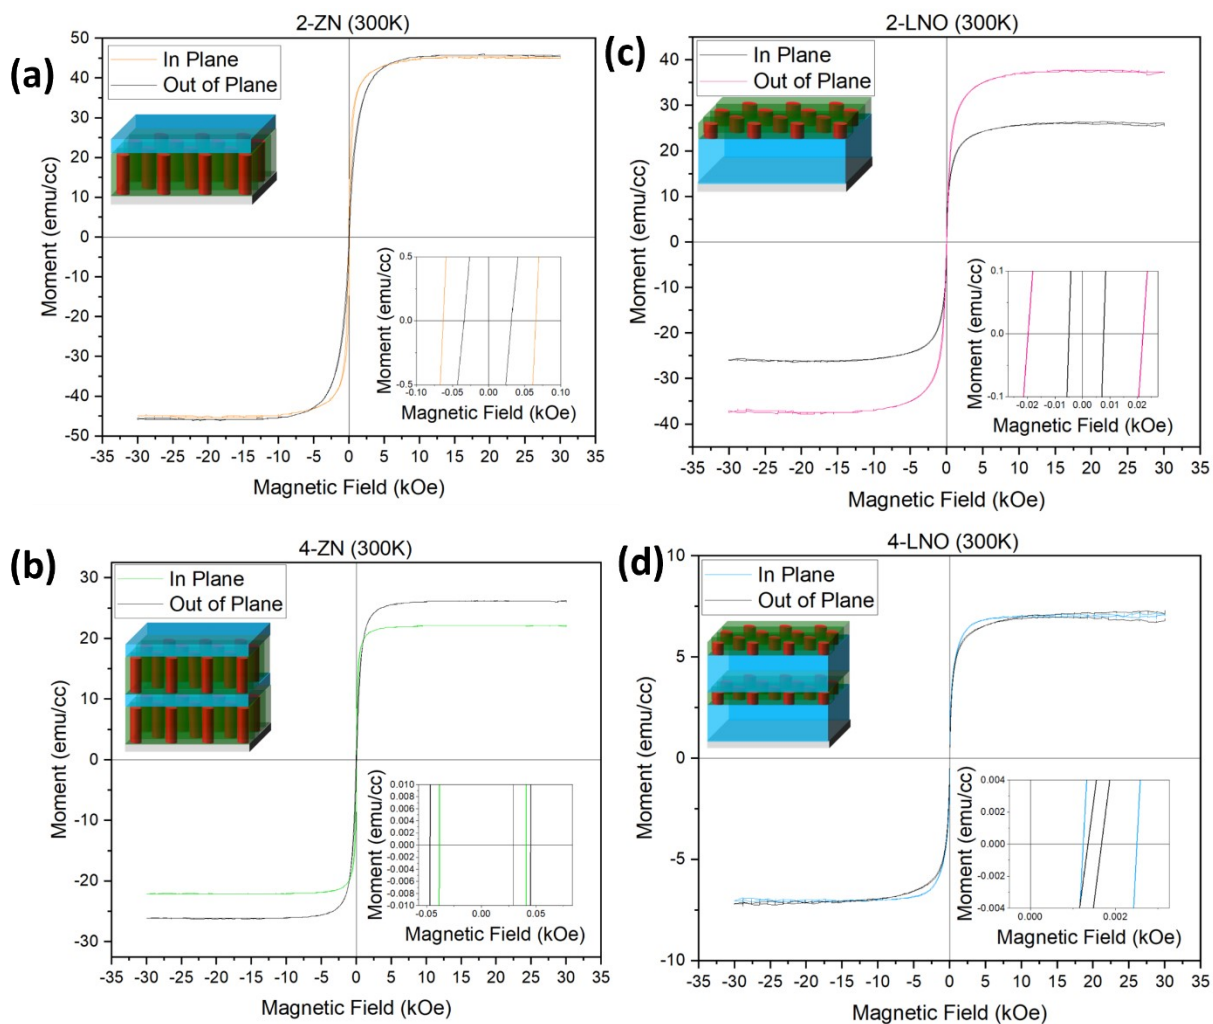

**Figure S1:** Magnetic data of magnetic moment versus magnetic field for (a)2-ZN, (b)4-ZN, (c)2-LNO, and (d)4-LNO measured at 300K. The inset graph seen in all plots is to show the coercivities.

**Table S1:** Extracted saturation polarization ( $P_{Max}$ ) and coercive Field ( $E_C$ ) from ferroelectric polarization versus electric field (P-E) loops for sample 2-ZN.

| 2-ZN                       |       |        |        |        |        |        |        |
|----------------------------|-------|--------|--------|--------|--------|--------|--------|
|                            | 1V    | 2V     | 3V     | 4V     | 5V     | 6V     | 7V     |
| $P_{Max}$ ( $\mu C/cm^2$ ) | 7.76  | 12.33  | 24.75  | 39.28  | 60.57  | 72.94  | 91.09  |
| $E_C$ (kV/cm)              | 61.87 | 134.77 | 240.59 | 324.23 | 408.64 | 528.60 | 633.42 |

**Table S2:** Extracted saturation polarization ( $P_{Max}$ ) and coercive Field ( $E_C$ ) from ferroelectric polarization versus electric field (P-E) loops for sample 4-ZN.

| 4-ZN                       |        |        |        |        |        |        |        |
|----------------------------|--------|--------|--------|--------|--------|--------|--------|
|                            | 1V     | 5V     | 10V    | 15V    | 20V    | 25V    | 30V    |
| $P_{Max}$ ( $\mu C/cm^2$ ) | 0.0011 | 0.0047 | 0.0079 | 0.013  | 0.016  | 0.020  | 0.026  |
| $E_C$ (kV/cm)              | 8.48   | 62.88  | 157.67 | 255.00 | 411.35 | 557.31 | 746.06 |

**Table S3:** Extracted saturation polarization ( $P_{Max}$ ) and coercive Field ( $E_C$ ) from ferroelectric polarization versus electric field (P-E) loops for sample 2-LNO.

| 2-LNO                      |       |        |        |        |        |         |         |
|----------------------------|-------|--------|--------|--------|--------|---------|---------|
|                            | 1V    | 5V     | 10V    | 15V    | 20V    | 25V     | 30V     |
| $P_{Max}$ ( $\mu C/cm^2$ ) | 0.39  | 1.92   | 3.57   | 5.03   | 7.32   | 10.54   | 14.21   |
| $E_C$ (kV/cm)              | 17.50 | 107.59 | 278.01 | 482.40 | 764.87 | 1104.08 | 1435.82 |

**Table S4:** Extracted saturation polarization ( $P_{Max}$ ) and coercive Field ( $E_C$ ) from ferroelectric polarization versus electric field (P-E) loops for sample 4-LNO.

| 4-LNO                      |        |        |        |        |        |        |        |
|----------------------------|--------|--------|--------|--------|--------|--------|--------|
|                            | 1V     | 5V     | 10V    | 15V    | 20V    | 25V    | 30V    |
| $P_{Max}$ ( $\mu C/cm^2$ ) | 0.0017 | 0.0069 | 0.015  | 0.020  | 0.027  | 0.034  | 0.040  |
| $E_C$ (kV/cm)              | 20.63  | 121.95 | 240.63 | 345.37 | 462.03 | 569.82 | 693.97 |
